# Supplementary material for: Evaluating the influence of environmental variables on the length-weight relationship and prediction modelling in flathead grey mullet, Mugil cephalus Linnaeus, 1758
Source: PeerJ. 2023 Feb 24;11:e14884. doi: 10.7717/peerj.14884 (PMC9969857; doi:10.7717/peerj.14884)
Supplement: Supplemental Information 12 — Each location wise log converted length and weight data of the samples collected during the study. [file peerj-11-14884-s012.xls]

## Sheet: Kolaghat
Sample ID	Location	Length (cm)	Weight (g)	Log L	Log W
MCS 16	Kolaghat, rupnarayan	23.4	128	1.36922	2.10721
MCS 17	Kolaghat, rupnarayan	18.5	64	1.26717	1.80618
MCS 18	Kolaghat, rupnarayan	18.3	64	1.26245	1.80618
MCS 20	Kolaghat, rupnarayan	18.2	63	1.26007	1.79934
MCS 21	Kolaghat, rupnarayan	15	33	1.17609	1.51851
MCS 22	Kolaghat, rupnarayan	16.5	40	1.21748	1.60206
MCS 23	Kolaghat, rupnarayan	17.2	61	1.23553	1.78533
MCS 24	Kolaghat, rupnarayan	16	43	1.20412	1.63347
MCS 25	Kolaghat, rupnarayan	16	40	1.20412	1.60206
MCS 26	Kolaghat, rupnarayan	17	50	1.23045	1.69897
MCS 27	Kolaghat, rupnarayan	15	36	1.17609	1.5563
MCS 28	Kolaghat, rupnarayan	15	36	1.17609	1.5563
MCS 29	Kolaghat, rupnarayan	22	97	1.34242	1.98677
MCS 30	Kolaghat, rupnarayan	20	82	1.30103	1.91381
MCS 31	Kolaghat, rupnarayan	20	85	1.30103	1.92942
MCS 32	Kolaghat, rupnarayan	16	42	1.20412	1.62325
MCS 33	Kolaghat, rupnarayan	15	40	1.17609	1.60206
MCS 34	Kolaghat, rupnarayan	15.5	37	1.19033	1.5682
MCS 35	Kolaghat, rupnarayan	16	40	1.20412	1.60206

## Sheet: Nisch+Kak+Digha
Sample ID	Location	Length (cm)	Weight (g)	Log L	Log W
MCS 537	Nischintpur	28	189	1.44716	2.27646
MCS 538	Nischintpur	25	146	1.39794	2.16435
MCS 539	Nischintpur	36	479	1.5563	2.68034
MCS 540	Nischintpur	35.2	443	1.54654	2.6464
MCS 541	Nischintpur	29.5	274	1.46982	2.43775
MCS 542	Nischintpur	28.3	214	1.45179	2.33041
MCS 543	Nischintpur	31	324	1.49136	2.51055
MCS 544	Nischintpur	31.5	312	1.49831	2.49415
MCS 545	Nischintpur	29	263	1.4624	2.41996
MCS 546	Nischintpur	31	295	1.49136	2.46982
MCS 547	Nischintpur	35	509	1.54407	2.70672
MCS 548	Nischintpur	32	358	1.50515	2.55388
MCS 549	Nischintpur	30.5	285	1.4843	2.45484
MCS 550	Nischintpur	30.3	284	1.48144	2.45332
MCS 551	Nischintpur	38.6	546	1.58659	2.73719
MCS 553	Nischintpur	40	660	1.60206	2.81954
MCS 554	Nischintpur	41.5	717	1.61805	2.85552
MCS 271	Kakdwip, Hoogly estuary	20	94	1.30103	1.97313
MCS 272	Kakdwip, Hoogly estuary	18.5	80	1.26717	1.90309
MCS 273	Kakdwip, Hoogly estuary	20.5	95	1.31175	1.97772
MCS 274	Kakdwip, Hoogly estuary	18.3	60	1.26245	1.77815
MCS 275	Kakdwip, Hoogly estuary	15	40	1.17609	1.60206
MCS 277	Kakdwip, Hoogly estuary	21.6	100	1.33445	2
MCS 278	Kakdwip, Hoogly estuary	22.1	110	1.34439	2.04139
MCS 279	Kakdwip, Hoogly estuary	21	90	1.32222	1.95424
MCS 280	Kakdwip, Hoogly estuary	21	90	1.32222	1.95424
MCS 281	Kakdwip, Hoogly estuary	20.5	100	1.31175	2
MCS 282	Kakdwip, Hoogly estuary	20.6	90	1.31387	1.95424
MCS 283	Kakdwip, Hoogly estuary	19.2	85	1.2833	1.92942
MCS 284	Kakdwip, Hoogly estuary	20.5	90	1.31175	1.95424
MCS 285	Kakdwip, Hoogly estuary	21.6	110	1.33445	2.04139
MCS 286	Kakdwip, Hoogly estuary	21.2	100	1.32634	2
MCS 287	Kakdwip, Hoogly estuary	20.7	100	1.31597	2
MCS 288	Kakdwip, Hoogly estuary	19.5	90	1.29003	1.95424
MCS 154	Digha	21.6	120	1.33445	2.07918
MCS 155	Digha	22.2	130	1.34635	2.11394
MCS 156	Digha	19.7	80	1.29447	1.90309
MCS 157	Digha	23.2	140	1.36549	2.14613

## Sheet: Paradeep+Zillanasi
Sample ID	Location	Length (cm)	Weight (g)	Log L	Log W
MCS 472	Paradeep, odisha (Mahanadi)	46.8	953	1.67025	2.97909
MCS 473	Paradeep, odisha (Mahanadi)	37.5	502	1.57403	2.7007
MCS 474	Paradeep, odisha (Mahanadi)	38.3	533	1.5832	2.72673
MCS 475	Paradeep, odisha (Mahanadi)	37	464	1.5682	2.66652
MCS 476	Paradeep, odisha (Mahanadi)	49	1028	1.6902	3.01199
MCS 477	Paradeep, odisha (Mahanadi)	43	766	1.63347	2.88423
MCS 478	Paradeep, odisha (Mahanadi)	49	1179	1.6902	3.07151
MCS 479	Paradeep, odisha (Mahanadi)	36.5	379	1.56229	2.57864
MCS 480	Paradeep, odisha (Mahanadi)	35.3	455	1.54777	2.65801
MCS 481	Paradeep, odisha (Mahanadi)	38	446	1.57978	2.64933
MCS 482	Paradeep, odisha (Mahanadi)	41	626	1.61278	2.79657
MCS 483	Paradeep, odisha (Mahanadi)	38.2	520	1.58206	2.716
MCS 484	Paradeep, odisha (Mahanadi)	37	502	1.5682	2.7007
MCS 485	Paradeep, odisha (Mahanadi)	37.6	560	1.57519	2.74819
MCS 486	Paradeep, odisha (Mahanadi)	28	209	1.44716	2.32015
MCS 487	Paradeep, odisha (Mahanadi)	29.6	293	1.47129	2.46687
MCS 488	Paradeep, odisha (Mahanadi)	36	407	1.5563	2.60959
MCS 489	Paradeep, odisha (Mahanadi)	33	317	1.51851	2.50106
MCS 490	Paradeep, odisha (Mahanadi)	39.4	279	1.5955	2.4456
MCS 491	Paradeep, odisha (Mahanadi)	39.2	242	1.59329	2.38382
MCS 492	zillanasi (Mahanadi)	43.5	800	1.63849	2.90309
MCS 493	zillanasi (Mahanadi)	44	900	1.64345	2.95424
MCS 494	zillanasi (Mahanadi)	22	95	1.34242	1.97772
MCS 495	zillanasi (Mahanadi)	22.9	100	1.35984	2
MCS 496	zillanasi (Mahanadi)	20.1	90	1.3032	1.95424
MCS 497	zillanasi (Mahanadi)	21.5	95	1.33244	1.97772
MCS 498	zillanasi (Mahanadi)	18.9	80	1.27646	1.90309

## Sheet: Pulicat
Sample ID	Location	Length (cm)	Weight (g)	log L	log W
MCS 201	Pulicate Lake	33.4	489	1.52375	2.68931
MCS 202	Pulicate Lake	38.6	577	1.58659	2.76118
MCS 203	Pulicate Lake	39	695	1.59106	2.84198
MCS 204	Pulicate Lake	37.2	523	1.57054	2.7185
MCS 205	Pulicate Lake	39.4	650	1.5955	2.81291
MCS 206	Pulicate Lake	38.5	677	1.58546	2.83059
MCS 207	Pulicate Lake	32.5	385	1.51188	2.58546
MCS 208	Pulicate Lake	32.6	390	1.51322	2.59106
MCS 209	Pulicate Lake	33	365	1.51851	2.56229
MCS 210	Pulicate Lake	32.2	336	1.50786	2.52634
MCS 265	Pulicate lake	34	397	1.53148	2.59879
MCS 266	Pulicate lake	34	494	1.53148	2.69373
MCS 267	Pulicate lake	34.7	509	1.54033	2.70672
MCS 268	Pulicate lake	33.3	385	1.52244	2.58546
MCS510	Pulicate lake	34.2	435	1.53403	2.63849
MCS511	Pulicate lake	41.5	680	1.61805	2.83251
MCS512	Pulicate lake	35	415	1.54407	2.61805
MCS513	Pulicate lake	32.8	332	1.51587	2.52114
MCS514	Pulicate lake	33	361	1.51851	2.55751
MCS516	Pulicate lake	36	410	1.5563	2.61278
MCS517	Pulicate lake	38.4	494	1.58433	2.69373
MCS518	Pulicate lake	32.5	324	1.51188	2.51055
MCS519	Pulicate lake	51.2	1335	1.70927	3.12548
MCS521	Pulicate lake	45.5	901	1.65801	2.95472
MCS522	Pulicate lake	42.2	655	1.62531	2.81624
MCS523	Pulicate lake	40	597	1.60206	2.77597
MCS524	Pulicate lake	47.8	1192	1.67943	3.07628
MCS525	Pulicate lake	40.3	612	1.60531	2.78675
MCS526	Pulicate lake	43.5	861	1.63849	2.935
MCS527	Pulicate lake	42	741	1.62325	2.86982
MCS528	Pulicate lake	41	577	1.61278	2.76118
MCS529	Pulicate lake	40.5	675	1.60746	2.8293
MCS530	Pulicate lake	51	1421	1.70757	3.15259
MCS531	Pulicate lake	45.5	915	1.65801	2.96142
MCS532	Pulicate lake	49	924	1.6902	2.96567
MCS533	Pulicate lake	42.3	721	1.62634	2.85794
MCS534	Pulicate lake	38.6	466	1.58659	2.66839
MCS535	Pulicate lake	40	711	1.60206	2.85187
MCS536	Pulicate lake	40	622	1.60206	2.79379
MCS515	Pulicate lake	44	330	1.64345	2.51851

## Sheet: Chennai+Kasi
Sample ID	Location	Length (cm)	Weight (g)	log L	Log W
MCS601	Chennai	41	732	1.61278	2.86451
MCS602	Chennai	40.5	652	1.60746	2.81425
MCS603	Chennai	44.5	950	1.64836	2.97772
MCS604	Chennai	39.5	650	1.5966	2.81291
MCS605	Chennai	36.2	507	1.55871	2.70501
MCS606	Chennai	34	406	1.53148	2.60853
MCS607	Chennai	28.3	220	1.45179	2.34242
MCS608	Chennai	27.5	189	1.43933	2.27646
MCS615	Chennai	35	430	1.54407	2.63347
MCS616	Chennai	35	506	1.54407	2.70415
MCS617	Chennai	33.5	373	1.52504	2.57171
MCS 05	Kasi medu	36	539	1.5563	2.73159
MCS 06	Kasi medu	41	730	1.61278	2.86332
MCS 07	Kasi medu	25.5	172	1.40654	2.23553
MCS 08	Kasi medu	26.5	180	1.42325	2.25527
MCS 10	Kasi medu	24.5	160	1.38917	2.20412
MCS 11	Kasi medu	24	145	1.38021	2.16137
MCS 12	Kasi medu	34	357	1.53148	2.55267
MCS 15	Kasi medu	31	250	1.49136	2.39794

## Sheet: Odiyur+Marakka
Sample ID	Location	Length (cm)	Weight (g)	Log L	Log W
MCS 255	Odiyur lake	29	215	1.4624	2.33244
MCS 256	Odiyur lake	32.3	298	1.5092	2.47422
MCS 257	Odiyur lake	26.2	206	1.4183	2.31387
MCS 258	Odiyur lake	26.5	189	1.42325	2.27646
MCS 259	Odiyur lake	27.8	191	1.44404	2.28103
MCS 260	Odiyur lake	28	232	1.44716	2.36549
MCS 262	Odiyur lake	27	211	1.43136	2.32428
MCS 261	Odiyur lake	20	85	1.30103	1.92942
MCS 254	Odiyur lake	38.7	255	1.58771	2.40654
MCS 436	Marakkanam	41.5	680	1.61805	2.83251
MCS 437	Marakkanam	35	415	1.54407	2.61805
MCS 438	Marakkanam	32.8	332	1.51587	2.52114
MCS 439	Marakkanam	33	361	1.51851	2.55751
MCS 440	Marakkanam	44	330	1.64345	2.51851
MCS 441	Marakkanam	36	410	1.5563	2.61278
MCS 442	Marakkanam	38.4	494	1.58433	2.69373
MCS 443	Marakkanam	32.5	324	1.51188	2.51055
MCS 444	Marakkanam	51.2	1335	1.70927	3.12548
MCS 445	Marakkanam	45.5	901	1.65801	2.95472
MCS 446	Marakkanam	42.2	655	1.62531	2.81624
MCS 447	Marakkanam	40	597	1.60206	2.77597
MCS 448	Marakkanam	47.8	1192	1.67943	3.07628
MCS 449	Marakkanam	40.3	612	1.60531	2.78675
MCS 450	Marakkanam	43.5	861	1.63849	2.935
MCS 451	Marakkanam	42	741	1.62325	2.86982
MCS 452	Marakkanam	41	577	1.61278	2.76118
MCS 453	Marakkanam	40.5	675	1.60746	2.8293
MCS 454	Marakkanam	51	1421	1.70757	3.15259
MCS 455	Marakkanam	45.5	915	1.65801	2.96142
MCS 456	Marakkanam	49	924	1.6902	2.96567
MCS 457	Marakkanam	42.3	721	1.62634	2.85794
MCS 458	Marakkanam	38.6	466	1.58659	2.66839
MCS 459	Marakkanam	40	711	1.60206	2.85187
MCS 460	Marakkanam	40	622	1.60206	2.79379
MCS 461	Marakkanam	43	768	1.63347	2.88536

## Sheet: Pondi+Cuddalore
Sample ID	Location	Length (cm)	Weight (g)	Log L	Log W
MCS 159	Pondicherry	25.6	156	1.40824	2.19312
MCS 160	Pondicherry	28	221	1.44716	2.34439
MCS 161	Pondicherry	26.5	182	1.42325	2.26007
MCS 162	Pondicherry	21	91	1.32222	1.95904
MCS 163	Pondicherry	24.2	120	1.38382	2.07918
MCS 164	Pondicherry	19.5	68	1.29003	1.83251
MCS 165	Pondicherry	45.3	868	1.6561	2.93852
MCS 166	Pondicherry	40.4	617	1.60638	2.79029
MCS 167	Pondicherry	35.4	404	1.549	2.60638
MCS168	Pondicherry	45.2	906	1.65514	2.95713
MCS169	Pondicherry	37.2	506	1.57054	2.70415
MCS 171	Pondicherry	33.6	369	1.52634	2.56703
MCS 172	Pondicherry	32.3	434	1.5092	2.63749
MCS 173	Pondicherry	38.6	611	1.58659	2.78604
MCS 418	Pondichery	39.3	563	1.59439	2.75051
MCS 419	Pondichery	42.4	712	1.62737	2.85248
MCS 421	Pondichery	38.5	506	1.58546	2.70415
MCS 422	Pondichery	44.2	720	1.64542	2.85733
MCS 423	Pondichery	44.5	757	1.64836	2.8791
MCS 425	Pondichery	46.2	859	1.66464	2.93399
MCS 426	Pondichery	41.9	570	1.62221	2.75587
MCS 427	Pondichery	44.2	804	1.64542	2.90526
MCS 429	Pondichery	42.3	654	1.62634	2.81558
MCS 432	Pondichery	39	601	1.59106	2.77887
MCS 435	Pondichery	34.5	433	1.53782	2.63649
MCS 431	Pondichery	34.2	344	1.53403	2.53656
MCS 430	Pondichery	38.4	439	1.58433	2.64246
MCS 424	Pondichery	42.6	753	1.62941	2.87679
MCS 428	Pondichery	42.5	523	1.62839	2.7185
MCS 433	Pondichery	40.2	661	1.60423	2.8202
MCS 420	Pondichery	44.2	638	1.64542	2.80482
MCS 434	Pondichery	40	832	1.60206	2.92012
MCS 174	Cuddalore	35.8	600	1.55388	2.77815
MCS 175	Cuddalore	34.5	500	1.53782	2.69897
MCS 176	Cuddalore	38.8	620	1.58883	2.79239
MCS 177	Cuddalore	38	580	1.57978	2.76343
MCS 178	Cuddalore	31	370	1.49136	2.5682
MCS179	Cuddalore	20	82	1.30103	1.91381
MCS 180	Cuddalore	20.6	90	1.31387	1.95424
MCS181	Cuddalore	21.2	98	1.32634	1.99123
MCS 182	Cuddalore	21.4	100	1.33041	2
MCS 183	Cuddalore	20.7	100	1.31597	2
MCS 184	Cuddalore	22.4	110	1.35025	2.04139
MCS 185	Cuddalore	19.8	80	1.29667	1.90309

## Sheet: Vellar Est
Sample ID	Location	Length (cm)	Weight (g)	Log L	Log W
MCS 36	Vellar Estuary	41.5	700	1.61805	2.8451
MCS 37	Vellar Estuary	44.5	1000	1.64836	3
MCS 38	Vellar Estuary	43.5	1000	1.63849	3
MCS 39	Vellar Estuary	42.2	900	1.62531	2.95424
MCS 40	Vellar Estuary	40	710	1.60206	2.85126
MCS 41	Vellar Estuary	43.2	890	1.63548	2.94939
MCS 42	Vellar Estuary	38.3	620	1.5832	2.79239
MCS 43	Vellar Estuary	42.6	800	1.62941	2.90309
MCS 44	Vellar Estuary	38.4	680	1.58433	2.83251
MCS 45	Vellar Estuary	37.5	620	1.57403	2.79239
MCS 46	Vellar Estuary	38.4	620	1.58433	2.79239
MCS 47	Vellar Estuary	35.8	600	1.55388	2.77815
MCS 48	Vellar Estuary	34.5	500	1.53782	2.69897
MCS 49	Vellar Estuary	38.8	620	1.58883	2.79239
MCS 50	Vellar Estuary	38	580	1.57978	2.76343
MCS 51	Vellar Estuary	31	370	1.49136	2.5682
MCS 57	Vellar Estuary	20	82	1.30103	1.91381
MCS 58	Vellar Estuary	20.6	90	1.31387	1.95424
MCS 59	Vellar Estuary	21.2	98	1.32634	1.99123
MCS 62	Vellar Estuary	21.4	100	1.33041	2
MCS 63	Vellar Estuary	20.7	100	1.31597	2
MCS 65	Vellar Estuary	22.4	110	1.35025	2.04139
MCS 66	Vellar Estuary	19.8	80	1.29667	1.90309
MCS 67	Vellar Estuary	21.6	120	1.33445	2.07918
MCS 69	Vellar Estuary	22.2	130	1.34635	2.11394
MCS 70	Vellar Estuary	19.7	80	1.29447	1.90309
MCS 71	Vellar Estuary	23.2	140	1.36549	2.14613
MCS 72	Vellar Estuary	22.4	110	1.35025	2.04139
MCS 73	Vellar Estuary	23.3	140	1.36736	2.14613
MCS 74	Vellar Estuary	23.6	142	1.37291	2.15229
MCS 75	Vellar Estuary	21.7	111	1.33646	2.04532
MCS 76	Vellar Estuary	22.4	123	1.35025	2.08991
MCS 77	Vellar Estuary	21.7	122	1.33646	2.08636
MCS 78	Vellar Estuary	21.5	109	1.33244	2.03743
MCS 80	Vellar Estuary	21	95	1.32222	1.97772
MCS 81	Vellar Estuary	19.2	88	1.2833	1.94448
MCS 82	Vellar Estuary	21.7	124	1.33646	2.09342
MCS 83	Vellar Estuary	19.3	80	1.28556	1.90309
MCS 84	Vellar Estuary	19.2	80	1.2833	1.90309
MCS 85	Vellar Estuary	20	94	1.30103	1.97313
MCS 211	Vellar Estuary	34	380	1.53148	2.57978
MCS 212	Vellar Estuary	46	1075	1.66276	3.03141
MCS 213	Vellar Estuary	36	408	1.5563	2.61066
MCS 214	Vellar Estuary	33.5	380	1.52504	2.57978
MCS 215	Vellar Estuary	37.5	472	1.57403	2.67394
MCS 216	Vellar Estuary	35	413	1.54407	2.61595
MCS 217	Vellar Estuary	32.5	272	1.51188	2.43457
MCS 218	Vellar Estuary	22	102	1.34242	2.0086
MCS 219	Vellar Estuary	19	68	1.27875	1.83251
MCS 220	Vellar Estuary	25	145	1.39794	2.16137
MCS 221	Vellar Estuary	43	767	1.63347	2.8848
MCS 222	Vellar Estuary	35	416	1.54407	2.61909
MCS 223	Vellar Estuary	24	132	1.38021	2.12057
MCS 224	Vellar Estuary	36.5	453	1.56229	2.6561
MCS 225	Vellar Estuary	45	958	1.65321	2.98137
MCS 226	Vellar Estuary	41	682	1.61278	2.83378
MCS 227	Vellar Estuary	42	686	1.62325	2.83632
MCS 228	Vellar Estuary	44	700	1.64345	2.8451
MCS 229	Vellar Estuary	33	350	1.51851	2.54407
MCS 230	Vellar Estuary	26	180	1.41497	2.25527
MCS 231	Vellar Estuary	42	687	1.62325	2.83696
MCS 232	Vellar Estuary	41	750	1.61278	2.87506
MCS 233	Vellar Estuary	40	606	1.60206	2.78247
MCS 234	Vellar Estuary	37	439	1.5682	2.64246

## Sheet: Coleroon+Kolli
Sample ID	Location	Length (cm)	Weight (g)	Log L	Log W
MCS 397	Colleroon estuary	33.5	437	1.52504	2.64048
MCS 398	Colleroon estuary	35.5	572	1.55023	2.7574
MCS 399	Colleroon estuary	34.5	554	1.53782	2.74351
MCS 400	Colleroon estuary	34.5	431	1.53782	2.63448
MCS 401	Colleroon estuary	34	353	1.53148	2.54777
MCS 402	Colleroon estuary	29	275	1.4624	2.43933
MCS 403	Colleroon estuary	34.5	468	1.53782	2.67025
MCS 404	Colleroon estuary	37	632	1.5682	2.80072
MCS 405	Colleroon estuary	33.5	411	1.52504	2.61384
MCS 406	Colleroon estuary	30	308	1.47712	2.48855
MCS 407	Colleroon estuary	41.5	700	1.61805	2.8451
MCS 408	Colleroon estuary	44.5	1000	1.64836	3
MCS 409	Colleroon estuary	43.5	1000	1.63849	3
MCS 410	Colleroon estuary	42.2	900	1.62531	2.95424
MCS 411	Colleroon estuary	40	710	1.60206	2.85126
MCS 412	Colleroon estuary	43.2	890	1.63548	2.94939
MCS 413	Colleroon estuary	38.3	620	1.5832	2.79239
MCS 414	Colleroon estuary	42.6	800	1.62941	2.90309
MCS 415	Colleroon estuary	38.4	680	1.58433	2.83251
MCS 416	Colleroon estuary	37.5	620	1.57403	2.79239
MCS 417	Colleroon estuary	38.4	620	1.58433	2.79239
MCS 235	Kolli Dam, Kuvery	17	45	1.23045	1.65321
MCS 236	Kolli Dam, Kuvery	16	40	1.20412	1.60206
MCS 237	Kolli Dam, Kuvery	14.5	40	1.16137	1.60206
MCS 238	Kolli Dam, Kuvery	16	42	1.20412	1.62325
MCS 239	Kolli Dam, Kuvery	16.7	47	1.22272	1.6721
MCS 240	Kolli Dam, Kuvery	17	50	1.23045	1.69897
MCS 241	Kolli Dam, Kuvery	32	353	1.50515	2.54777
MCS 242	Kolli Dam, Kuvery	31	280	1.49136	2.44716
MCS 243	Kolli Dam, Kuvery	35	400	1.54407	2.60206
MCS 244	Kolli Dam, Kuvery	30.5	277	1.4843	2.44248
MCS 245	Kolli Dam, Kuvery	32	304	1.50515	2.48287
MCS 246	Kolli Dam, Kuvery	33.5	370	1.52504	2.5682
MCS 247	Kolli Dam, Kuvery	33	338	1.51851	2.52892
MCS 248	Kolli Dam, Kuvery	30.5	285	1.4843	2.45484
MCS 249	Kolli Dam, Kuvery	33	357	1.51851	2.55267
MCS 250	Kolli Dam, Kuvery	31	300	1.49136	2.47712
MCS 251	Kolli Dam, Kuvery	34	380	1.53148	2.57978

## Sheet: Mandapam
Sample ID	Location	Length (cm)	Weight (g)	Log L	Log W
MCS 91	Mandapam	41	750	1.61278	2.87506
MCS 92	Mandapam	40	606	1.60206	2.78247
MCS 93	Mandapam	37	439	1.5682	2.64246
MCS 94	Mandapam	21.5	107	1.33244	2.02938
MCS 95	Mandapam	22	105	1.34242	2.02119
MCS 96	Mandapam	21	85	1.32222	1.92942
MCS 97	Mandapam	21.5	99	1.33244	1.99564
MCS 98	Mandapam	20	75	1.30103	1.87506
MCS 99	Mandapam	22.5	103	1.35218	2.01284
MCS 101	Mandapam	21	100	1.32222	2
MCS 102	Mandapam	21	89	1.32222	1.94939
MCS 103	Mandapam	23	125	1.36173	2.09691
MCS 104	Mandapam	24	123	1.38021	2.08991
MCS 358	Mandapam	21	96	1.32222	1.98227
MCS 359	Mandapam	21	95	1.32222	1.97772
MCS 360	Mandapam	24.5	145	1.38917	2.16137
MCS 361	Mandapam	21	92	1.32222	1.96379
MCS 362	Mandapam	24.5	147	1.38917	2.16732
MCS 363	Mandapam	21.5	92	1.33244	1.96379
MCS 364	Mandapam	24	140	1.38021	2.14613
MCS 365	Mandapam	26	202	1.41497	2.30535
MCS 366	Mandapam	17	53	1.23045	1.72428
MCS 367	Mandapam	22	114	1.34242	2.0569
MCS 368	Mandapam	24	156	1.38021	2.19312
MCS 369	Mandapam	23	116	1.36173	2.06446
MCS 370	Mandapam	23	123	1.36173	2.08991
MCS 371	Mandapam	25.5	158	1.40654	2.19866
MCS 372	Mandapam	23	118	1.36173	2.07188
MCS 373	Mandapam	18	55	1.25527	1.74036
MCS 374	Mandapam	21	90	1.32222	1.95424
MCS 375	Mandapam	17.5	55	1.24304	1.74036
MCS 376	Mandapam	23	130	1.36173	2.11394
MCS 377	Mandapam	35	476	1.54407	2.67761
MCS 378	Mandapam	35	467	1.54407	2.66932
MCS 379	Mandapam	36.5	561	1.56229	2.74896
MCS 380	Mandapam	35	487	1.54407	2.68753
MCS 381	Mandapam	49	1070	1.6902	3.02938
MCS 382	Mandapam	46.5	996	1.66745	2.99826
MCS 383	Mandapam	44	850	1.64345	2.92942
MCS 384	Mandapam	46.5	894	1.66745	2.95134
MCS 385	Mandapam	44	796	1.64345	2.90091
MCS 386	Mandapam	44.5	916	1.64836	2.9619
MCS 387	Mandapam	48	1080	1.68124	3.03342
MCS 388	Mandapam	39	586	1.59106	2.7679
MCS 389	Mandapam	44.5	1005	1.64836	3.00217
MCS 390	Mandapam	42	742	1.62325	2.8704
MCS 391	Mandapam	44	855	1.64345	2.93197
MCS 392	Mandapam	45.5	735	1.65801	2.86629
MCS 393	Mandapam	45	900	1.65321	2.95424
MCS 394	Mandapam	50	1210	1.69897	3.08279
MCS 395	Mandapam	43	736	1.63347	2.86688
MCS 396	Mandapam	44	842	1.64345	2.92531

[truncated: 5 more sheets: Tuticorin, Manakudy, Thengapattanam, Karwar+Goa, Ratngiri]
